# Supplementary material for: Cytotoxic Furan- and Pyrrole-Containing Scalarane Sesterterpenoids Isolated from the Sponge Scalarispongia sp
Source: PubMed Central journal article supplement (PMC6429051; doi:10.3390/molecules24050840), 2019-02-27
Supplement: molecules-24-00840-s001.pdf [file molecules-24-00840-s001.pdf]

Supplementary Materials

**Cytotoxic Furan- and Pyrrole-Containing Scalarane Sesterterpenoids  
Isolated from the Sponge *Scalarispongia* sp.**

**Yeon-Ju Lee**<sup>1,2,\*</sup>, **Su Hyun Kim**<sup>1,2</sup>, **Hansol Choi**<sup>1</sup>, **Hyi-Seung Lee**<sup>1,2</sup>, **Jong Seok Lee**<sup>1</sup>,  
**Hee Jae Shin**<sup>1,2</sup>, and **Jihoon Lee**<sup>1,2</sup>

<sup>1</sup> Marine Natural Products Chemistry Laboratory, Korea Institute of Ocean Science and Technology, 385  
Haeyangro, Busan 49111, Republic of Korea

<sup>2</sup> Department of Marine Biotechnology, University of Science and Technology, 217 Gajungro, Daejeon  
34113, Republic of Korea

\* Correspondence: yjlee@kiost.ac.kr; Tel.: +82-51-664-3350

**Table S1.** Complete NMR data of **3** in CDCl<sub>3</sub>

**Figure S1.** <sup>1</sup>H and <sup>13</sup>C NMR Spectra (500 MHz and 125 MHz, CDCl<sub>3</sub>) of **3**

**Figure S2.** HMBC and HSQC NMR spectra of **3**

**Figure S3.** COSY and NOESY NMR spectra of **3**

**Table S2.** Complete NMR data of **4** in CDCl<sub>3</sub>

**Figure S4.** <sup>1</sup>H and <sup>13</sup>C NMR Spectra (500 MHz and 125 MHz, CDCl<sub>3</sub>) of **4**

**Figure S5.** HMBC and HSQC NMR spectra of **4**

**Figure S6.** COSY and NOESY NMR spectra of **4**

**Table S3.** Complete NMR data of **5** in CDCl<sub>3</sub>

**Figure S7.** <sup>1</sup>H and <sup>13</sup>C NMR Spectra (500 MHz and 125 MHz, CDCl<sub>3</sub>) of **5**

**Figure S8.** HMBC and HSQC NMR spectra of **5**

**Figure S9.** COSY and NOESY NMR spectra of **5**

**Figure S10.** <sup>1</sup>H and <sup>13</sup>C NMR Spectra (500 MHz and 125 MHz, CDCl<sub>3</sub>) of **1**

**Figure S11.** <sup>1</sup>H and <sup>13</sup>C NMR Spectra (500 MHz and 125 MHz, CDCl<sub>3</sub>) of **2**

**Figure S12.** <sup>1</sup>H and <sup>13</sup>C NMR Spectra (500 MHz and 125 MHz, CDCl<sub>3</sub>) of **6**

**Figure S13.** <sup>1</sup>H and NMR Spectra (500 MHz, CDCl<sub>3</sub>) of the crude extract obtained by the treatment of the mixture of **1** and **2** with silica and methanol

**Table S1.** Complete NMR data of **3** in CDCl<sub>3</sub>

| Position | $\delta_C$ , type    | $\delta_H$ ( <i>J</i> in Hz)              | HMBC                                          | COSY                                 |
|----------|----------------------|-------------------------------------------|-----------------------------------------------|--------------------------------------|
| 1        | 39.9 CH <sub>2</sub> | 0.62 ,br dd (14.0, 14.0)<br>1.58, m       |                                               | 1.58<br>0.62                         |
| 2        | 18.7 CH <sub>2</sub> | 1.38, m<br>1.61, m                        |                                               | 1.61,0.62<br>1.38                    |
| 3        | 42.1 CH <sub>2</sub> | 1.13, m<br>1.36, m                        |                                               | 1.36<br>1.13                         |
| 4        | 33.5 C               |                                           |                                               |                                      |
| 5        | 56.8 CH              | 0.83, m                                   | 37.2, 39.9                                    |                                      |
| 6        | 18.2 CH <sub>2</sub> | 1.31, m<br>1.57, m                        |                                               | 1.57<br>1.06,1.31                    |
| 7        | 41.2 CH <sub>2</sub> | 1.06, br dd (13.5,10.5)<br>1.78, m        | 37.7, 53.1, 56.8                              | 1.06,1.31<br>1.57,1.78,              |
| 8        | 37.7 C               |                                           |                                               |                                      |
| 9        | 53.1 CH              | 1.31, m                                   | 21.9                                          | 1.81, 1.92                           |
| 10       | 37.2 C               |                                           |                                               |                                      |
| 11       | 21.9 CH <sub>2</sub> | 1.81, m<br>1.92, m                        | 41.7                                          | 1.31, 1.92, 5.48<br>1.31, 1.81, 5.48 |
| 12       | 73.0 CH              | 5.48, br s                                | 172.7                                         | 1.81, 1.92                           |
| 13       | 41.7 C               |                                           |                                               |                                      |
| 14       | 50.9 CH              | 2.34, br d (13.5)                         | 34.9, 37.7, 41.7, 194.6                       | 2.47, 2.57                           |
| 15       | 34.9 CH <sub>2</sub> | 2.47, dd (17.5,13.5)<br>2.57, br d (17.5) | 41.7, 50.9, 120.2, 194.6<br>41.7, 50.9, 194.6 | 2.34, 2.57<br>2.34, 2.47             |
| 16       | 194.6 C              |                                           |                                               |                                      |
| 17       | 120.2 C              |                                           |                                               |                                      |
| 18       | 172.7 C              |                                           |                                               |                                      |
| 19       | 142.9 CH             | 7.26, br s                                | 106.5, 120.2, 172.7                           | 6.59                                 |
| 20       | 106.5 CH             | 6.59, br s                                | 120.2, 142.9, 172.7                           | 7.26                                 |
| 21       | 33.5 CH <sub>3</sub> | 0.85, s                                   | 33.5, 42.1, 56.8                              |                                      |
| 22       | 21.5 CH <sub>3</sub> | 0.81, s                                   | 33.5, 42.1, 56.8                              |                                      |
| 23       | 16.3 CH <sub>3</sub> | 0.85, s                                   | 53.1, 56.8                                    |                                      |
| 24       | 17.0 CH <sub>3</sub> | 0.99, s                                   | 37.7, 41.2, 50.9, 53.1                        |                                      |
| 25       | 20.4 CH <sub>3</sub> | 1.32, s                                   | 41.7, 50.9, 73.0, 172.7                       |                                      |
| 12OAc    | 172.7 C              |                                           |                                               |                                      |
|          | 21.4 CH <sub>3</sub> | 1.88, s                                   | 170.2                                         |                                      |

**Figure S3.**  $^1\text{H}$  and  $^{13}\text{C}$  NMR Spectra (500 MHz and 125 MHz,  $\text{CDCl}_3$ ) of **3**

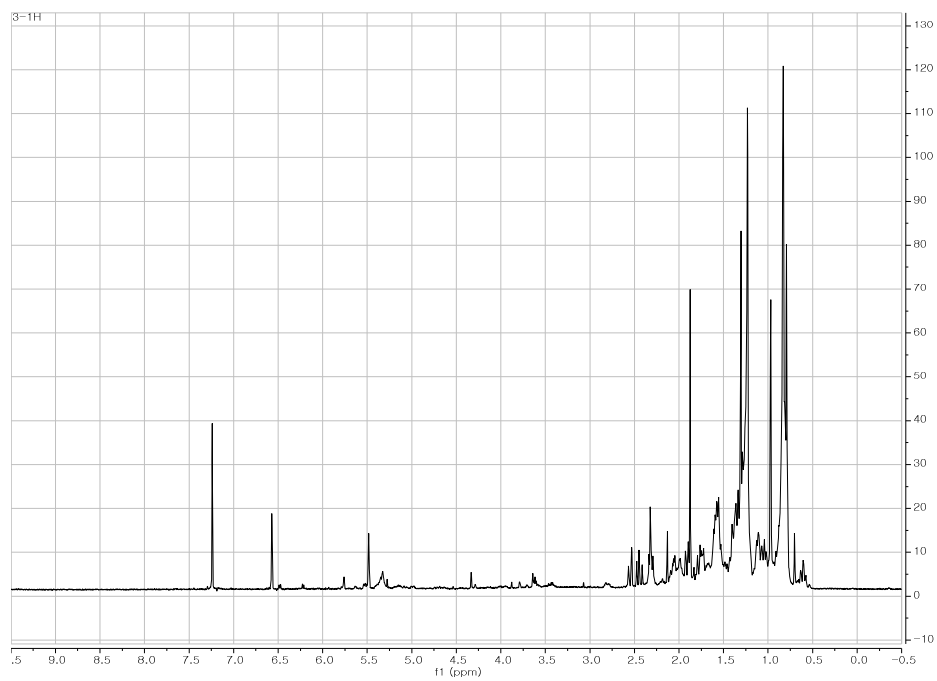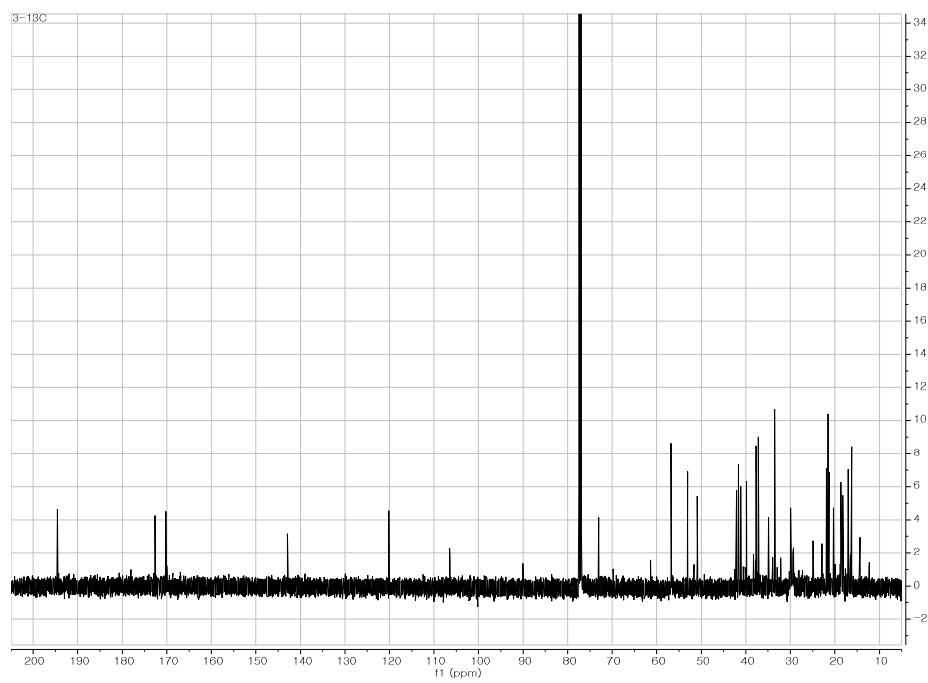

**Figure S2.** HMBC and HSQC NMR spectra of **3**

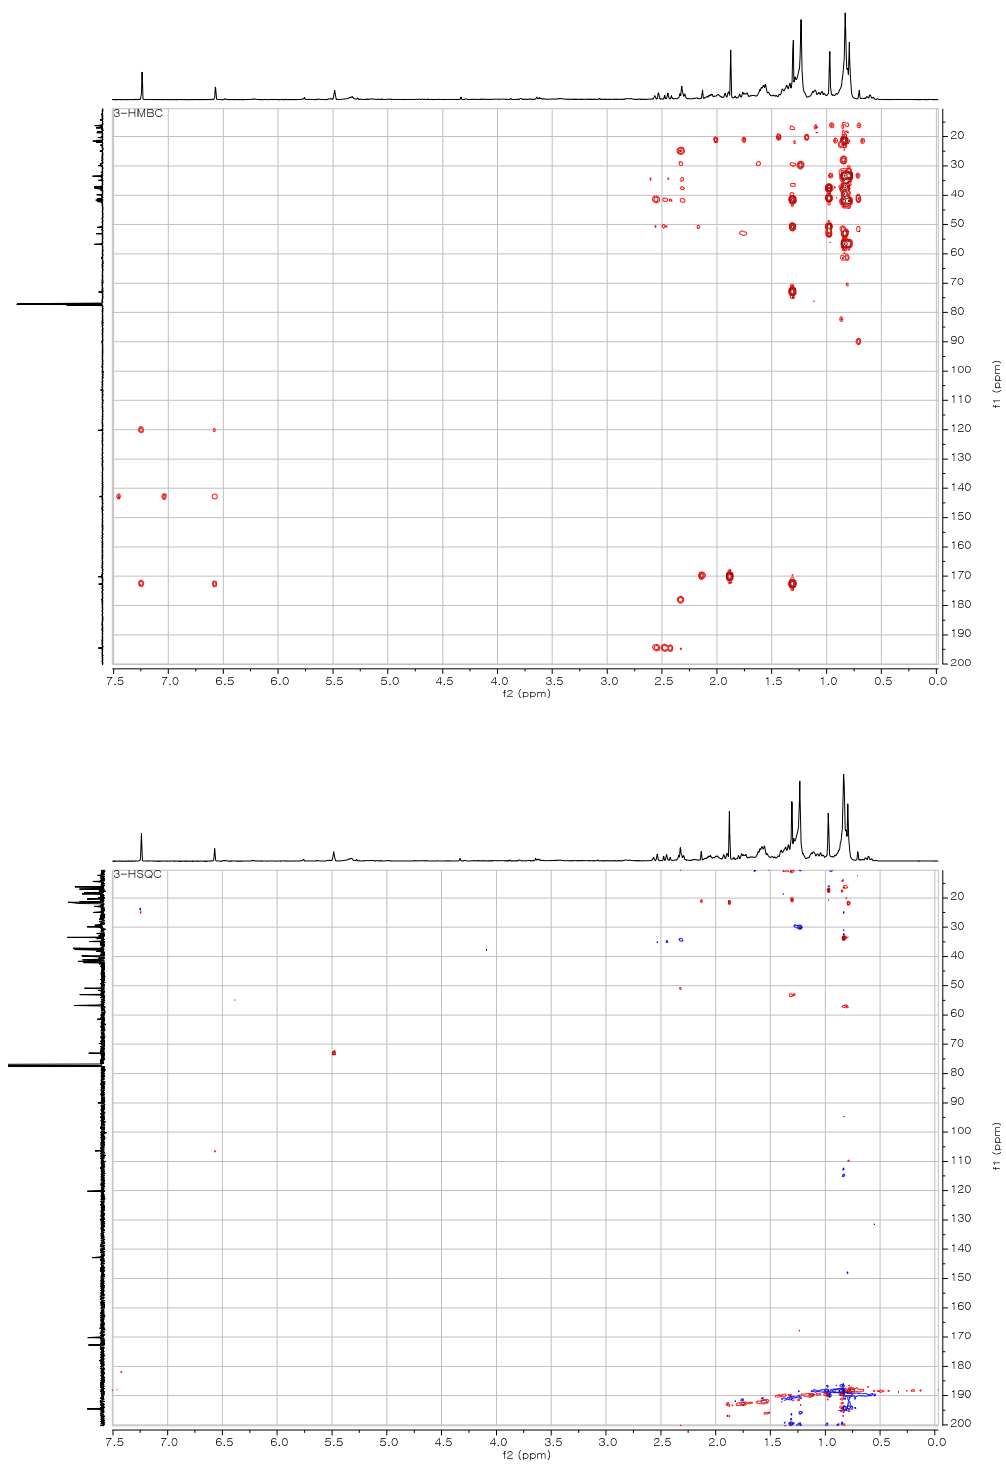

**Figure S3.** COSY and NOESY NMR spectra of **3**

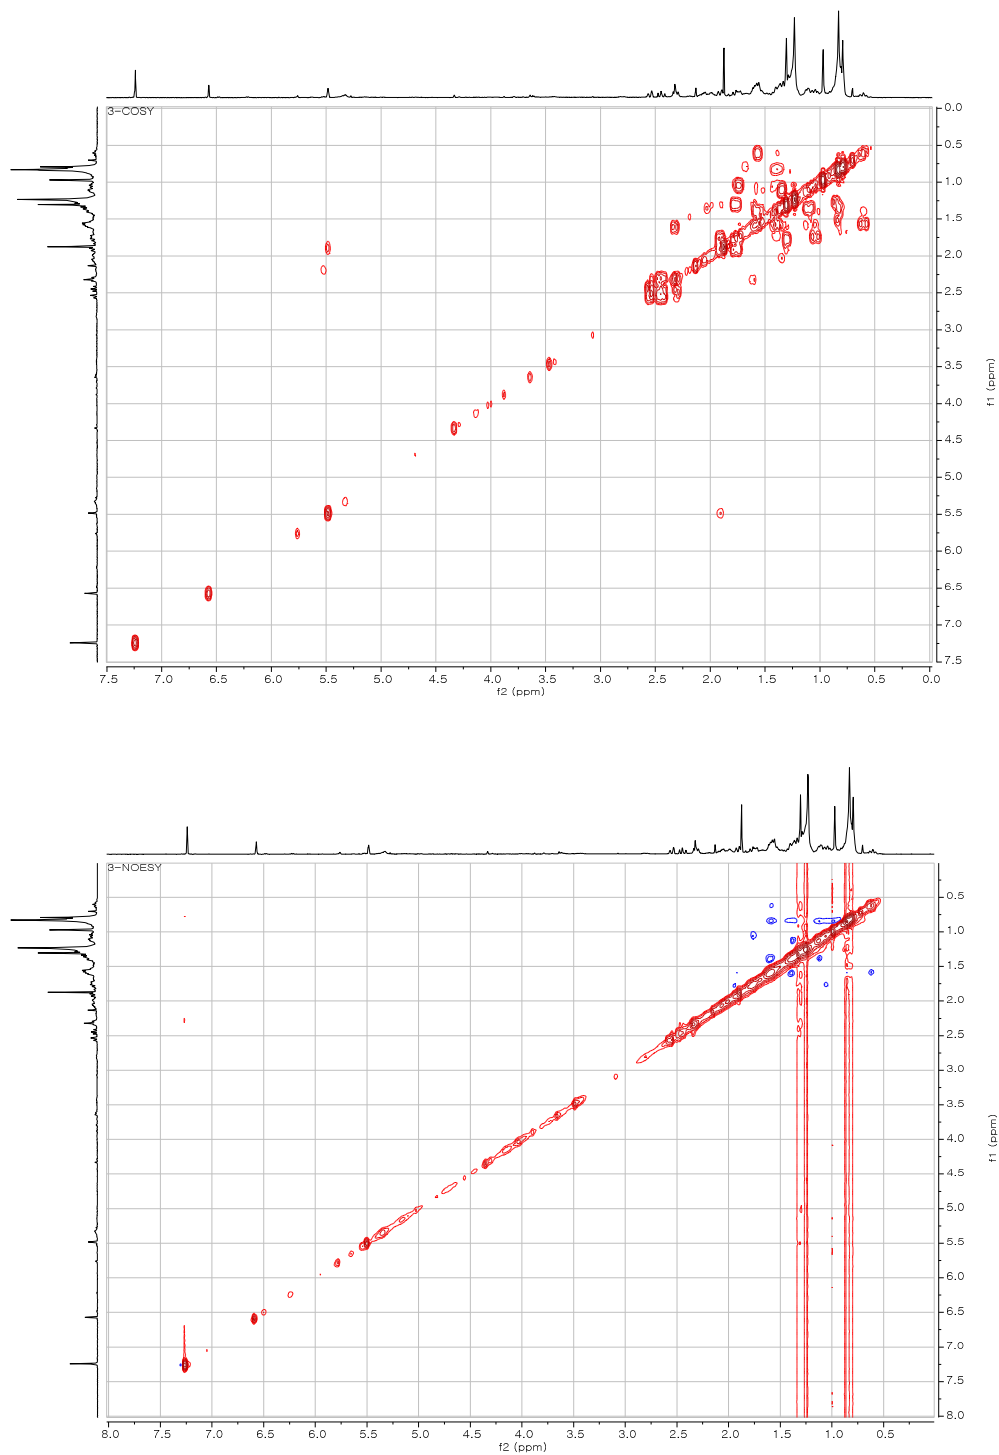

**Table S2.** Complete NMR data of **4** in CDCl<sub>3</sub>

| Position | $\delta_C$ , type    | $\delta_H$ ( <i>J</i> in Hz)           | HMBC                                                      | COSY               |
|----------|----------------------|----------------------------------------|-----------------------------------------------------------|--------------------|
| 1        | 39.9:CH <sub>2</sub> | 0.63, ddd (14.5, 14.5, 4.5)<br>1.58, m | 37.2, 42.2                                                | 1.39, 1.58<br>0.63 |
| 2        | 18.3:CH <sub>2</sub> | 1.39, m<br>1.56, m                     | 37.2, 39.9                                                | 0.63, 1.56<br>1.39 |
| 3        | 42.2:CH <sub>2</sub> | 1.12, ddd (13.0, 13.0, 4.0)<br>1.35, m | 33.5                                                      | 1.35<br>1.12       |
| 4        | 33.5:C               |                                        |                                                           |                    |
| 5        | 56.7:CH              | 0.83, m                                |                                                           | 1.40               |
| 6        | 18.7:CH <sub>2</sub> | 1.40, m<br>1.58, m                     | 56.7<br>37.2, 38.0, 56.7                                  | 0.83<br>1.77       |
| 7        | 41.4:CH <sub>2</sub> | 1.04, ddd (11.5, 11.5, 3.5)<br>1.77, m | 17.1<br>38.0, 52.7, 56.7                                  | 1.77<br>1.58, 1.84 |
| 8        | 38.0:C               |                                        |                                                           |                    |
| 9        | 52.7:CH              | 1.38, m                                | 22.6, 51.6                                                | 1.81               |
| 10       | 37.2:C               |                                        |                                                           |                    |
| 11       | 22.6:CH <sub>2</sub> | 1.63, m<br>1.81, m                     | 38.0, 52.7, 74.8                                          | 1.38, 5.45         |
| 12       | 74.8:CH              | 5.45, br s                             | 52.7, 171.2                                               | 1.81               |
| 13       | 39.5:C               |                                        |                                                           |                    |
| 14       | 51.6:CH              | 2.19, dd (7.3, 10.0)                   | 17.1, 25.2, 35.4, 38.0, 39.5,<br>41.4, 52.7, 135.5, 196.8 | 2.48, 2.49         |
| 15       | 35.4:CH <sub>2</sub> | 2.48, br d (7.3)<br>2.49, br d (10.0)  | 39.5, 51.6, 121.1, 196.8<br>39.5, 51.6, 121.1, 196.8      | 2.19<br>2.19       |
| 16       | 196.8:C              |                                        |                                                           |                    |
| 17       | 121.1:C              |                                        |                                                           |                    |
| 18       | 135.5:C              |                                        |                                                           |                    |
| 19       | 119.5:CH             | 7.30, br s                             | 111.2, 121.1, 135.5                                       | 6.32               |
| 20       | 111.2:CH             | 6.32, br s                             | 119.5, 121.1, 135.5                                       | 7.30               |
| 21       | 33.5:CH <sub>3</sub> | 0.84, s                                | 21.6, 33.5, 42.2, 56.7                                    |                    |
| 22       | 21.6:CH <sub>3</sub> | 0.81, s                                | 33.5, 42.2, 56.7                                          |                    |
| 23       | 16.4:CH <sub>3</sub> | 0.84, s                                | 37.2, 39.9, 52.7                                          |                    |
| 24       | 17.1:CH <sub>3</sub> | 0.98, s                                | 38.0, 41.4, 51.6                                          |                    |
| 25       | 25.2:CH <sub>3</sub> | 1.27, s                                | 39.5, 51.6, 74.8, 135.5                                   |                    |
| 12OAc    | 171.2:C              |                                        |                                                           |                    |
|          | 21.5:CH <sub>3</sub> | 1.91, s                                | 171.2                                                     |                    |

**Figure S4.**  $^1\text{H}$  and  $^{13}\text{C}$  NMR Spectra (500 MHz and 125 MHz,  $\text{CDCl}_3$ ) of **4**

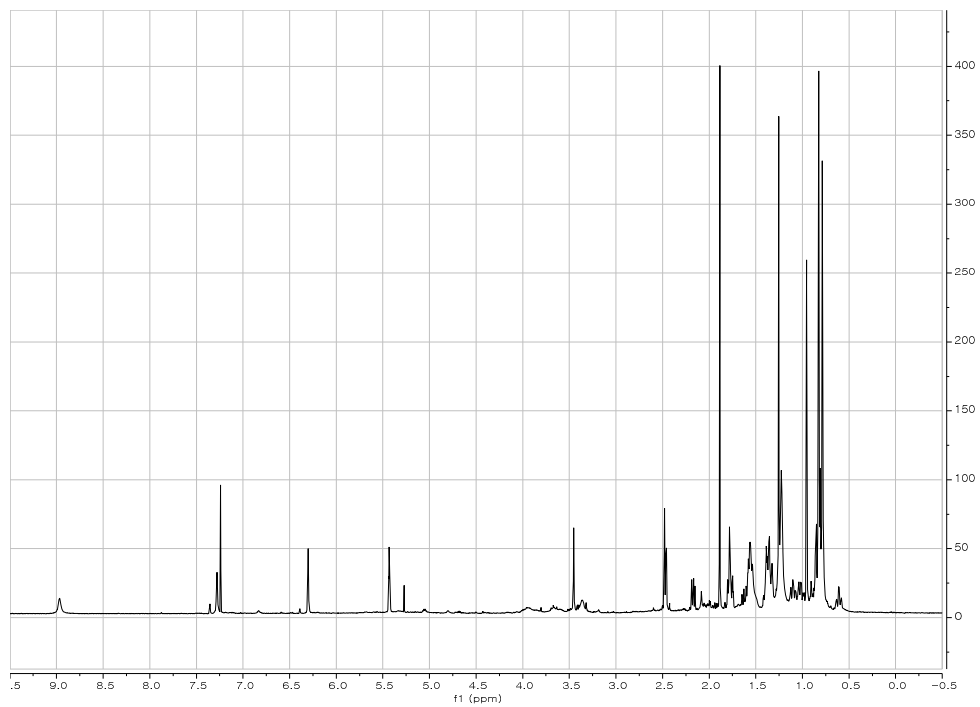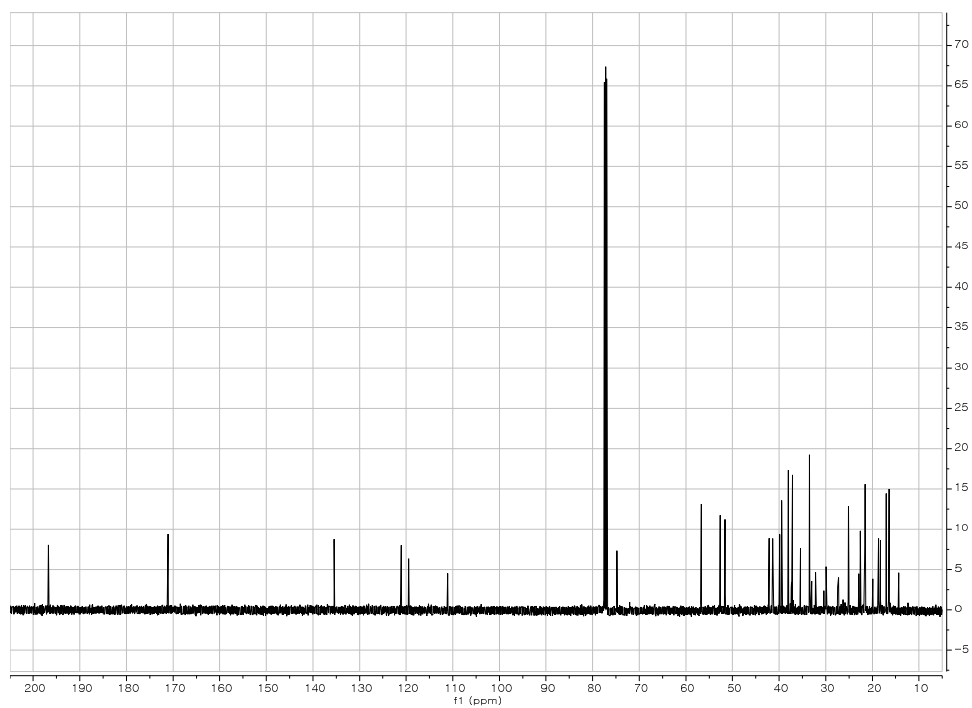

Figure S5. HMBC and HSQC NMR spectra of **4**

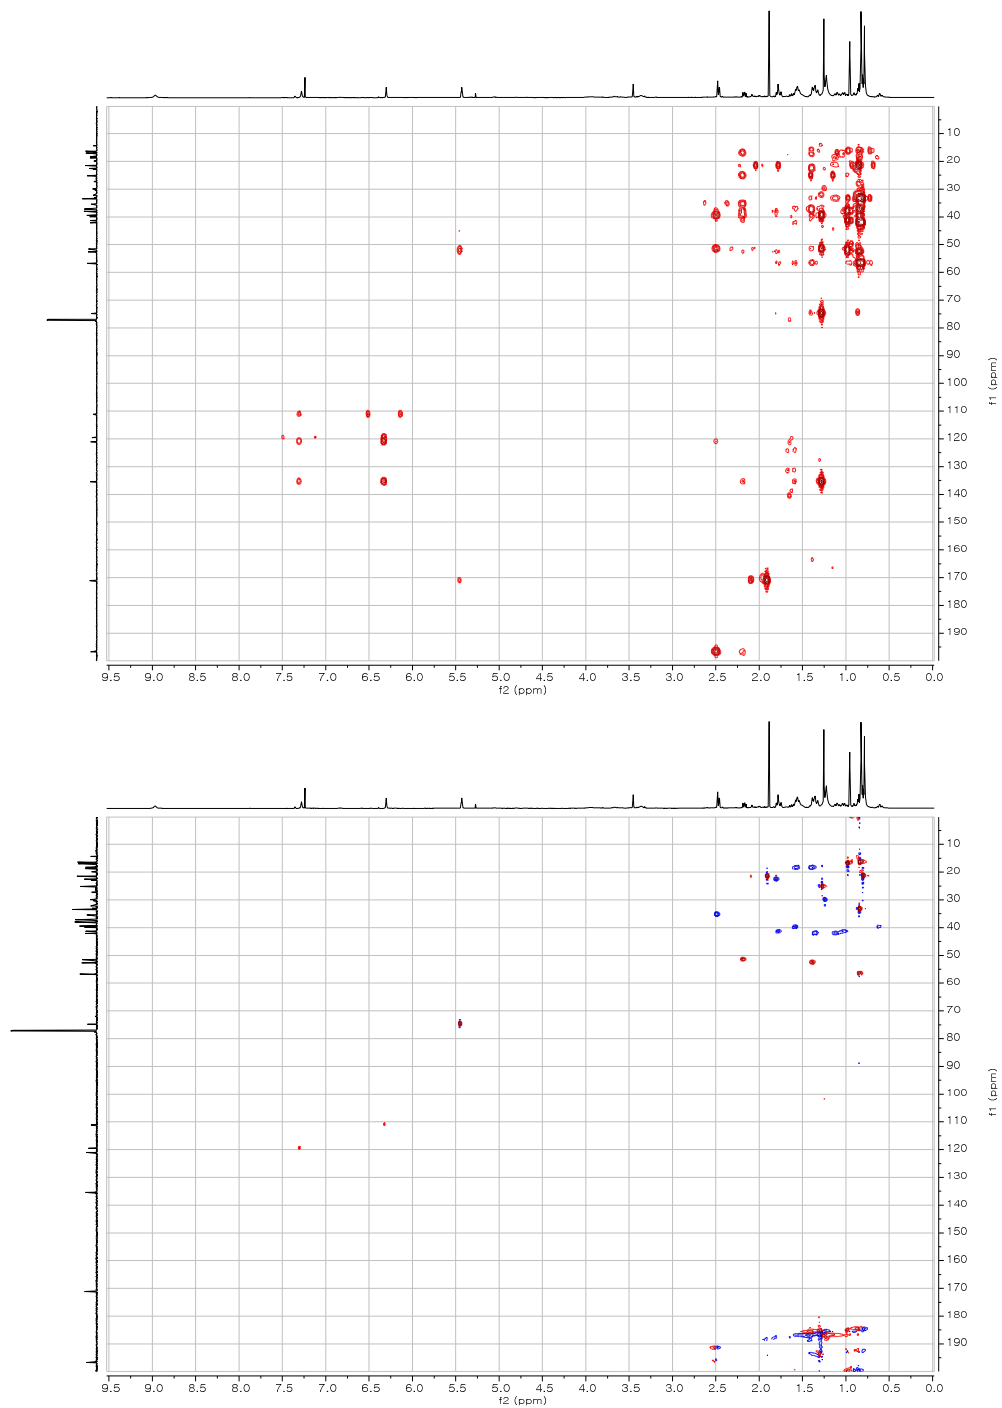



**Figure S6.** COSY and NOESY NMR spectra of **4**

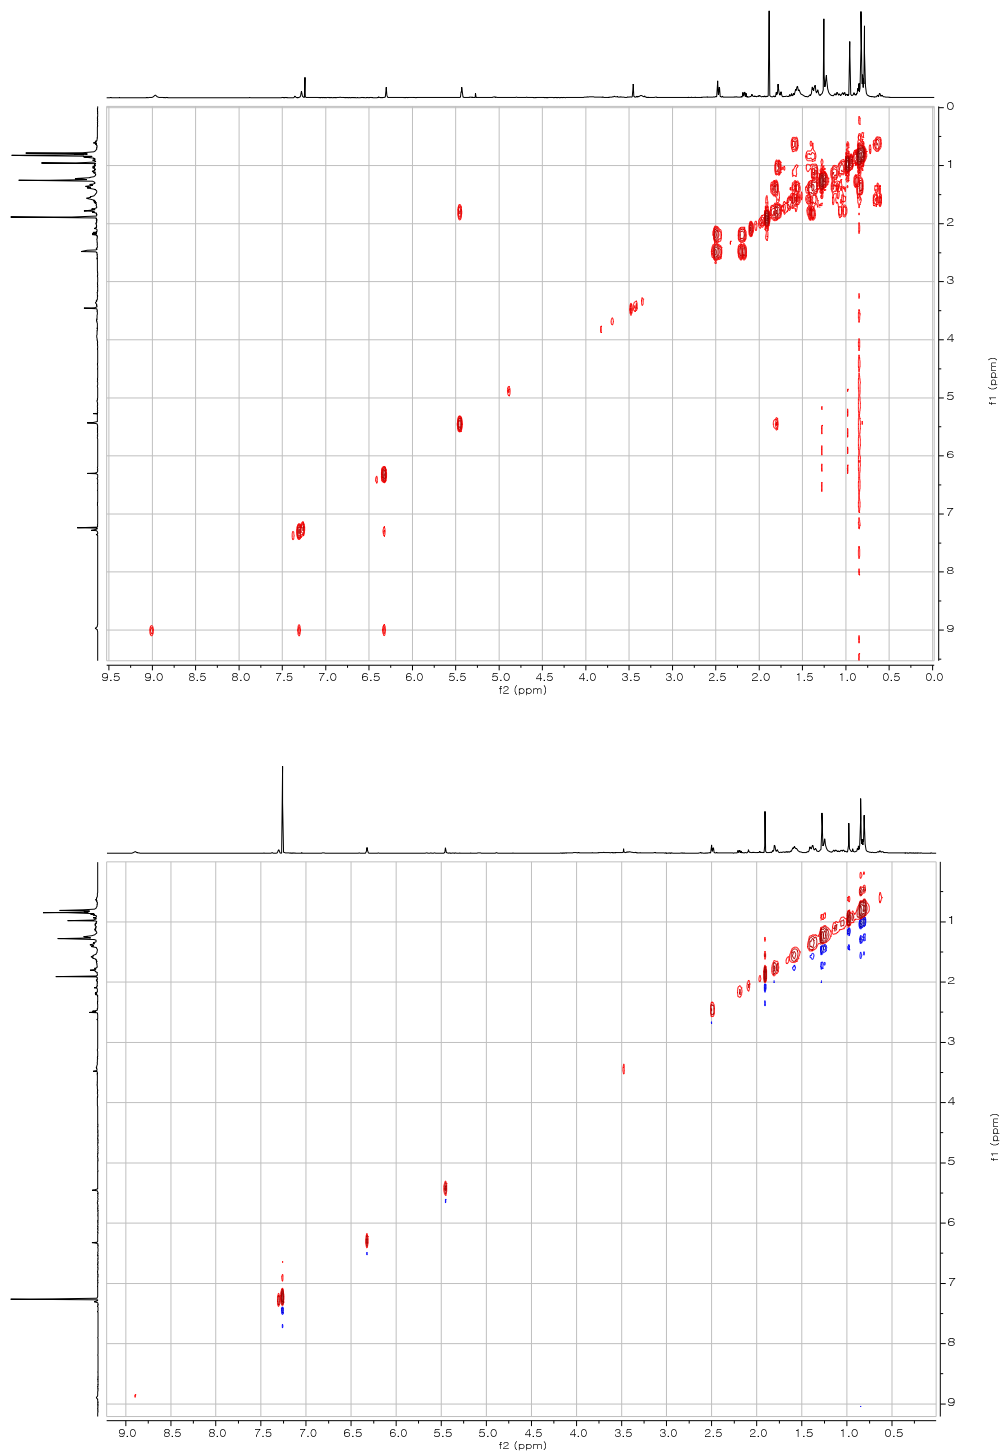

**Table S3.** Complete NMR data of **5** in CDCl<sub>3</sub>

| Position | $\delta_C$ , type    | $\delta_H$ ( <i>J</i> in Hz)           | HMBC                                        | COSY                                 |
|----------|----------------------|----------------------------------------|---------------------------------------------|--------------------------------------|
| 1        | 39.9 CH <sub>2</sub> | 0.62, ddd (13.0, 13.0, 3.0)<br>1.57, m | 42.2, 56.5                                  | 1.40, 1.60<br>1.60                   |
| 2        | 18.7 CH <sub>2</sub> | 1.40, m<br>1.60, m                     |                                             | 0.62, 1.11, 1.60<br>0.62, 1.11, 1.40 |
| 3        | 42.2 CH <sub>2</sub> | 1.11, br dd (12.5, 5.0)<br>1.35, m     | 21.5<br>39.9, 56.5                          | 1.35, 1.40, 1.60,<br>1.11            |
| 4        | 33.5 C               |                                        |                                             |                                      |
| 5        | 56.5 CH              | 0.90, m                                | 33.5                                        | 1.44                                 |
| 6        | 18.3 CH <sub>2</sub> | 1.44, m<br>1.60, m                     | 41.4                                        | 0.90, 1.11, 1.60<br>1.44, 1.82       |
| 7        | 41.4 CH <sub>2</sub> | 1.11, m<br>1.82, m                     | 17.6, 37.2                                  | 1.44, 1.82<br>1.11, 1.60             |
| 8        | 37.2 C               |                                        |                                             |                                      |
| 9        | 53.2 CH              | 1.35, m                                | 37.2, 45.9, 56.5                            | 1.74                                 |
| 10       | 37.2 C               |                                        |                                             |                                      |
| 11       | 22.0 CH <sub>2</sub> | 1.74, br d (14.0)<br>1.82, m           | 37.2, 53.2<br>53.2                          | 1.35, 1.82, 5.42<br>1.74, 5.42       |
| 12       | 73.6 CH              | 5.42, br s                             | 45.9, 53.2                                  | 1.74, 1.82                           |
| 13       | 41.2 C               |                                        |                                             |                                      |
| 14       | 45.9 CH              | 2.14, br d (13.0)                      | 17.6, 21.0, 23.8, 37.2<br>41.2, 71.8, 158.9 | 1.59                                 |
| 15       | 23.8 CH <sub>2</sub> | 1.59, m<br>2.07, br d (15.0)           | 45.9<br>41.2, 71.8, 116.4                   | 2.07, 2.14, 4.18<br>1.59, 4.18       |
| 16       | 71.8 C               | 4.18, d (3.5)                          | 45.9, 116.4, 158.9                          | 1.59, 2.07                           |
| 17       | 116.4 C              |                                        |                                             |                                      |
| 18       | 158.9 C              |                                        |                                             |                                      |
| 19       | 141.0 CH             | 7.19, br s                             | 110.2, 116.4, 158.9                         | 6.28                                 |
| 20       | 110.2 CH             | 6.28, br s                             | 116.4, 141.0, 158.9                         | 7.19                                 |
| 21       | 33.5 CH <sub>3</sub> | 0.85, s                                | 21.5, 33.5, 42.2, 56.5                      |                                      |
| 22       | 21.5 CH <sub>3</sub> | 0.81, s                                | 33.5, 42.2                                  |                                      |
| 23       | 16.2 CH <sub>3</sub> | 0.83, s                                | 37.2, 39.9, 53.2                            |                                      |
| 24       | 17.6 CH <sub>3</sub> | 0.93, s                                | 37.2, 41.4, 45.9, 53.2                      |                                      |
| 25       | 21.0 CH <sub>3</sub> | 1.18, s                                | 41.2, 45.9, 73.6, 158.9                     |                                      |
| 12OAc    | 170.8 C              |                                        |                                             |                                      |
|          | 21.6 CH <sub>3</sub> | 1.86, s                                | 170.8                                       |                                      |
| 16OMe    | 56.6 CH <sub>3</sub> | 3.40, s                                | 71.8                                        |                                      |

**Figure S7.**  $^1\text{H}$  and  $^{13}\text{C}$  NMR Spectra (500 MHz and 125 MHz,  $\text{CDCl}_3$ ) of **5**

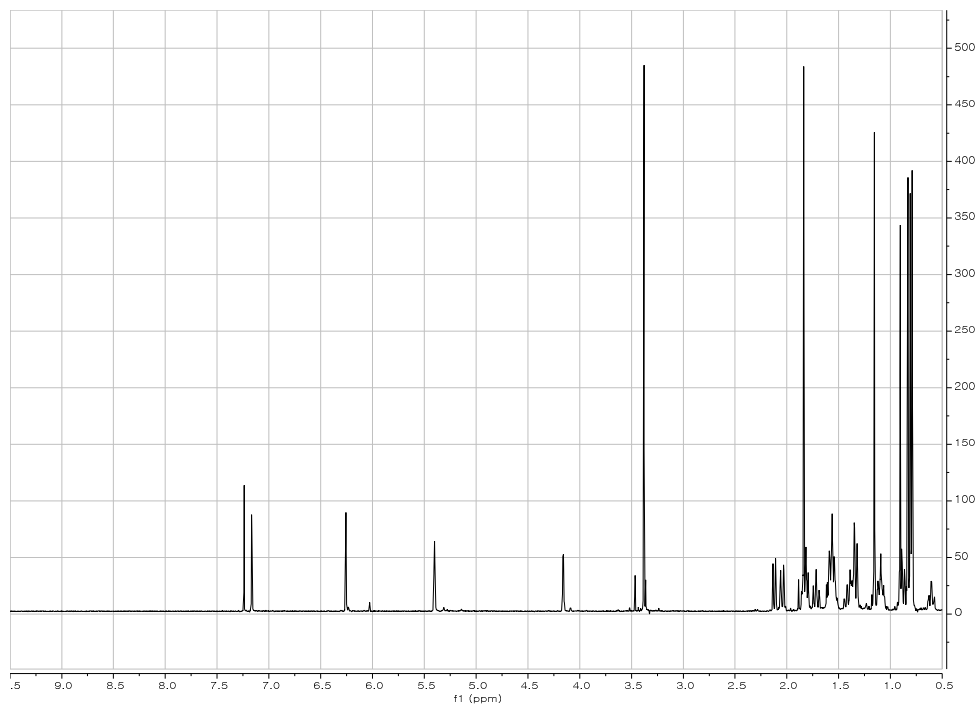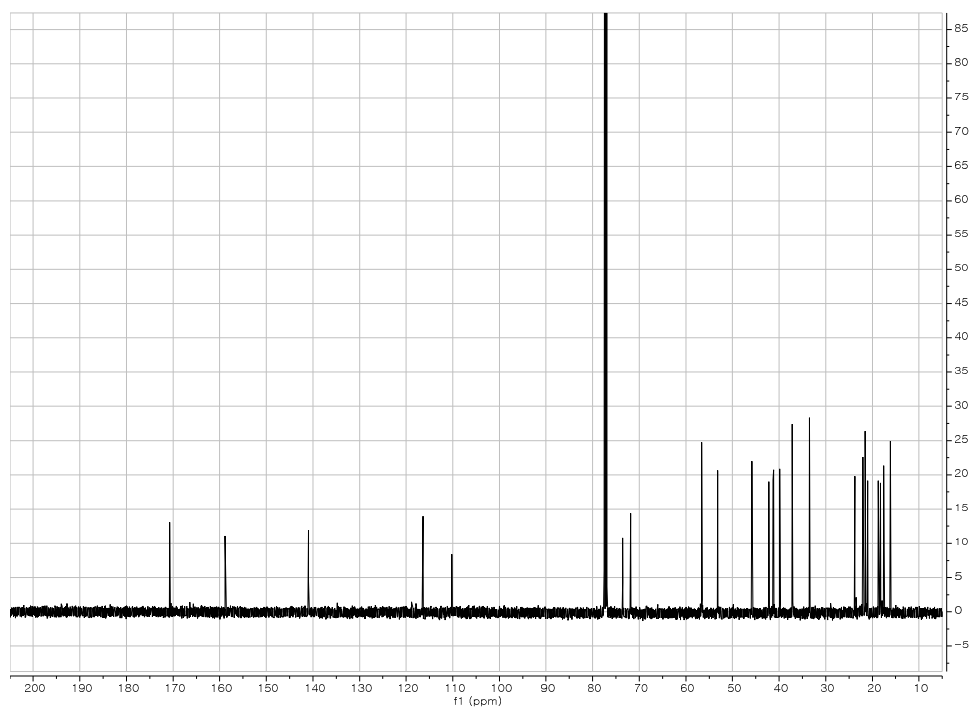

**Figure S8.** HMBC and HSQC NMR spectra of **5**

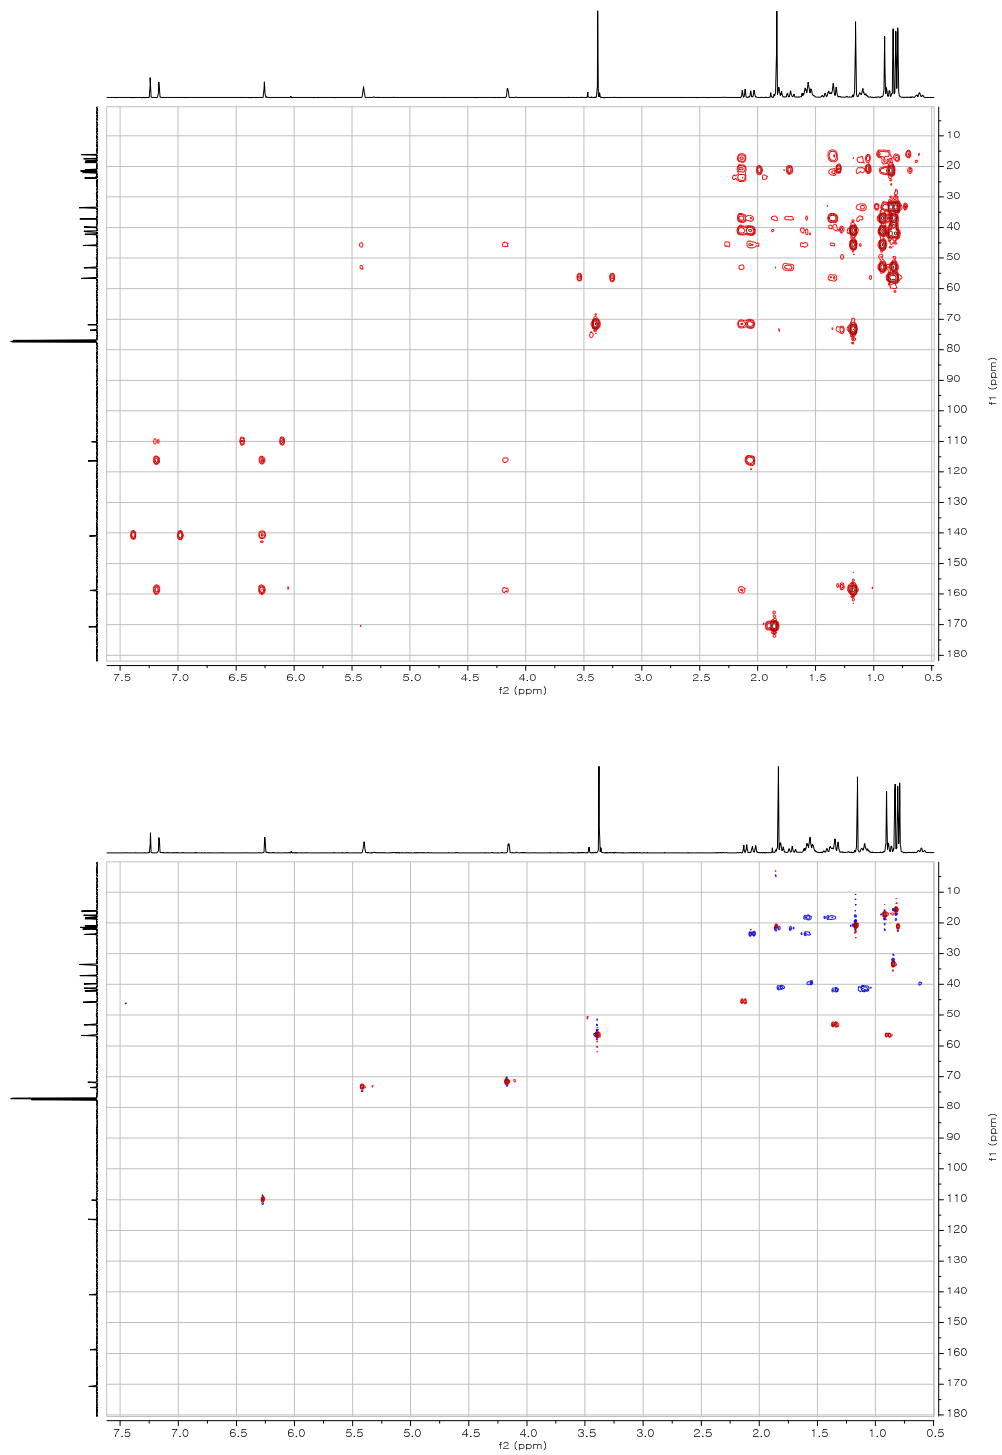

**Figure S9.** COSY and NOESY NMR spectra of **5**

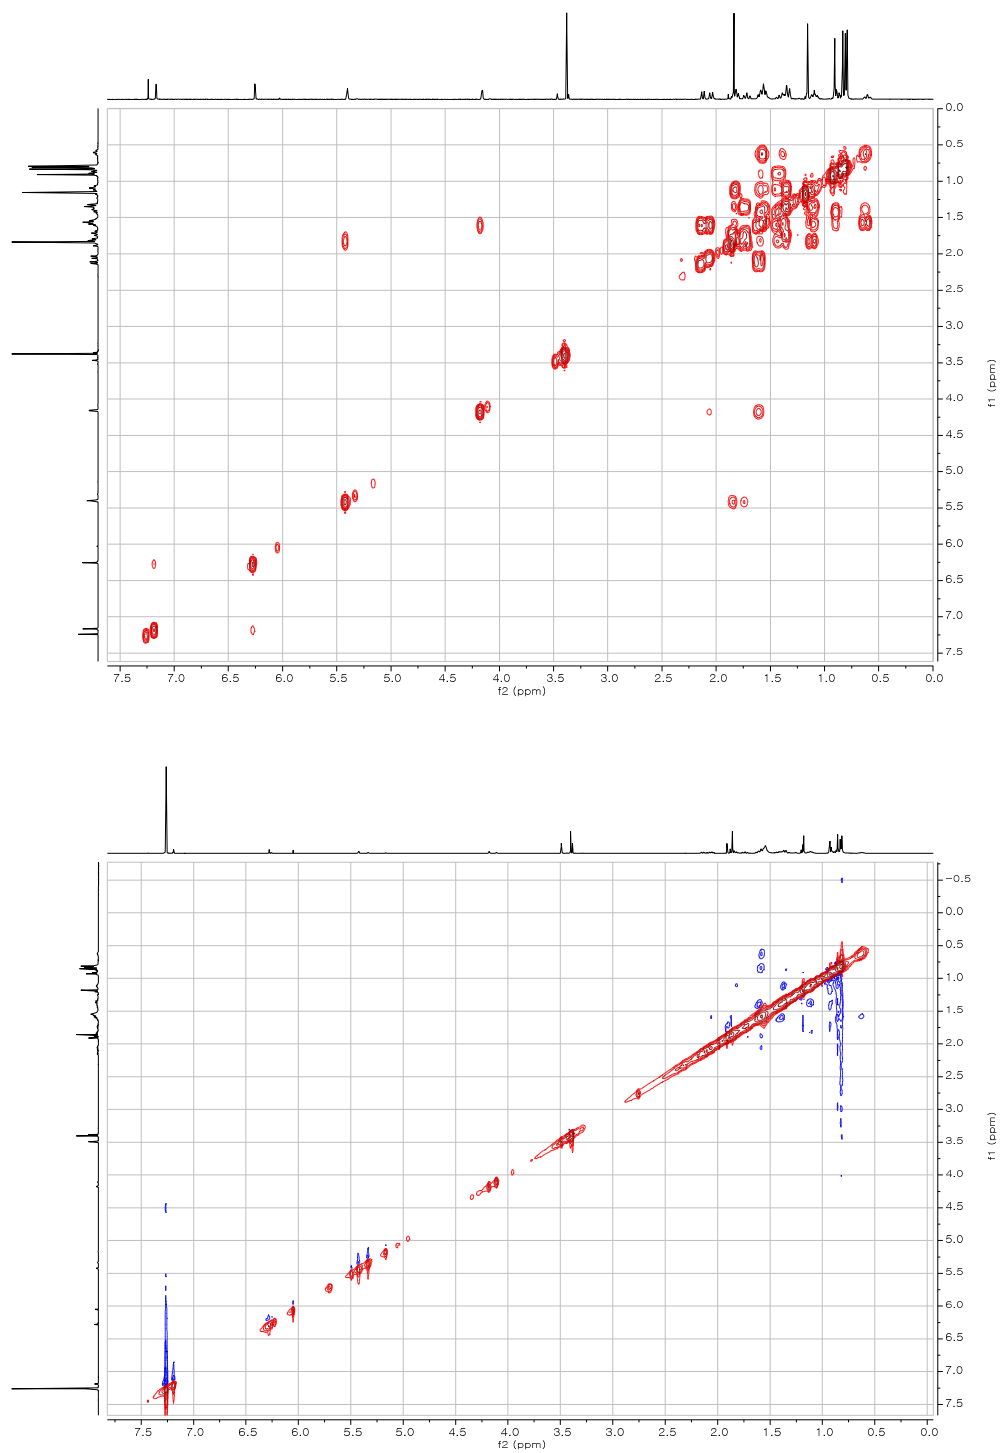

**Figure S10.**  $^1\text{H}$  and  $^{13}\text{C}$  NMR Spectra (500 MHz and 125 MHz,  $\text{CDCl}_3$ ) of **1**

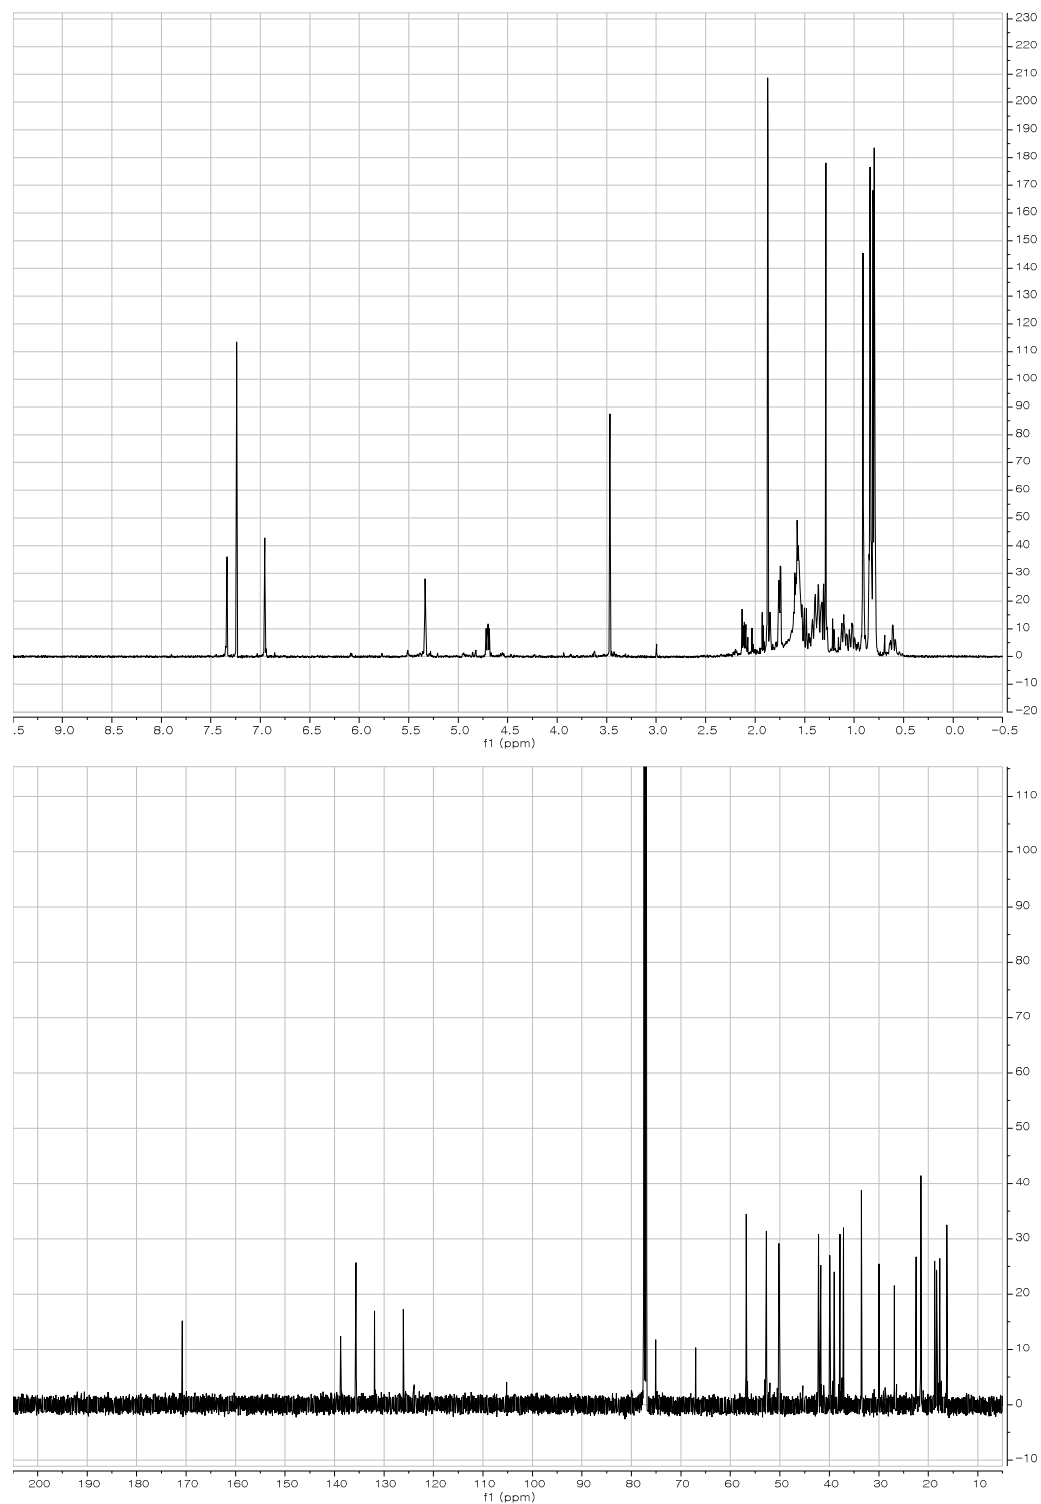

**Figure S11.**  $^1\text{H}$  and  $^{13}\text{C}$  NMR Spectra (500 MHz and 125 MHz,  $\text{CDCl}_3$ ) of **2**

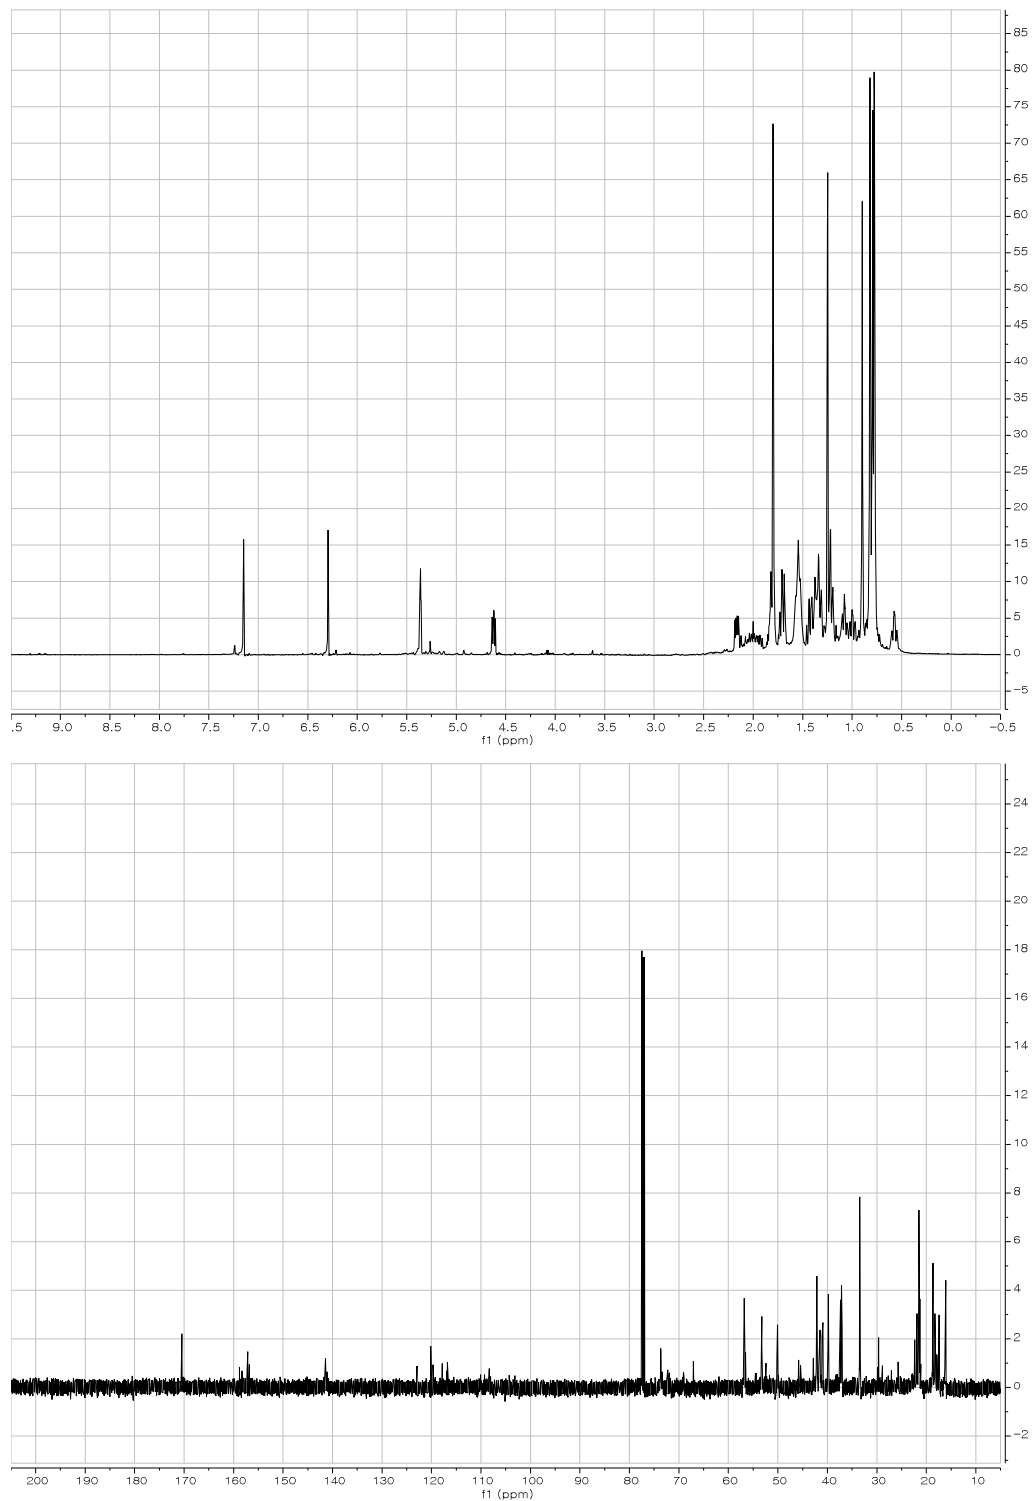

**Figure S12.**  $^1\text{H}$  and  $^{13}\text{C}$  NMR Spectra (500 MHz and 125 MHz,  $\text{CDCl}_3$ ) of **6**

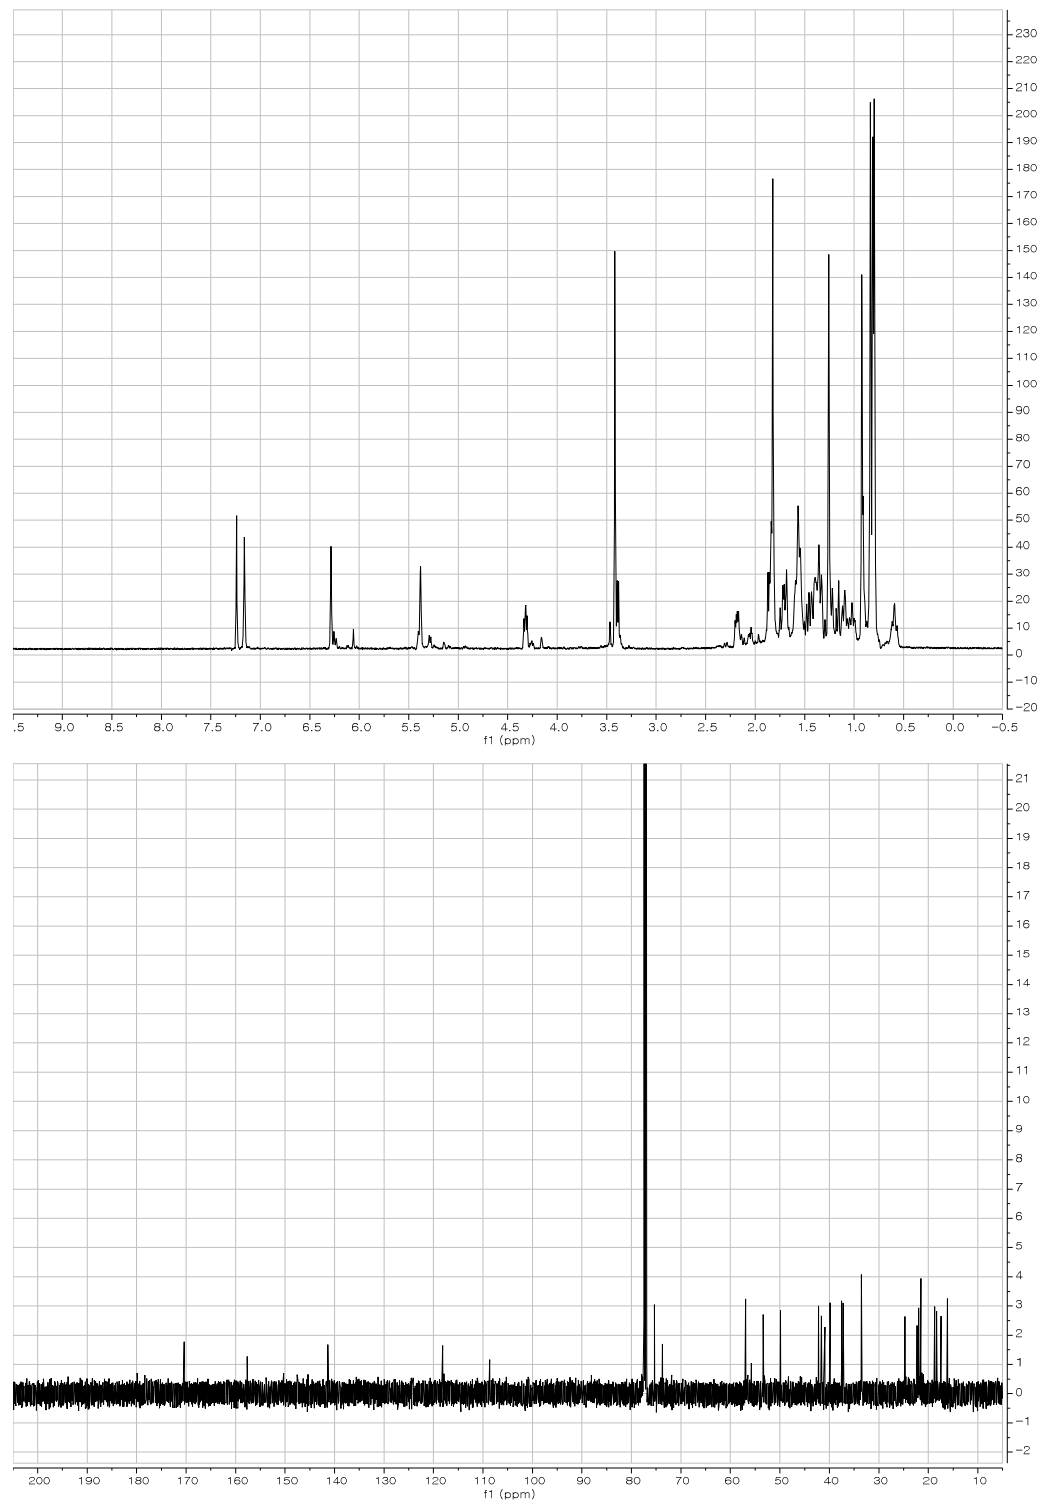



**Figure S13.** The comparison of  $^1\text{H}$  and NMR Spectra (500 MHz,  $\text{CDCl}_3$ )

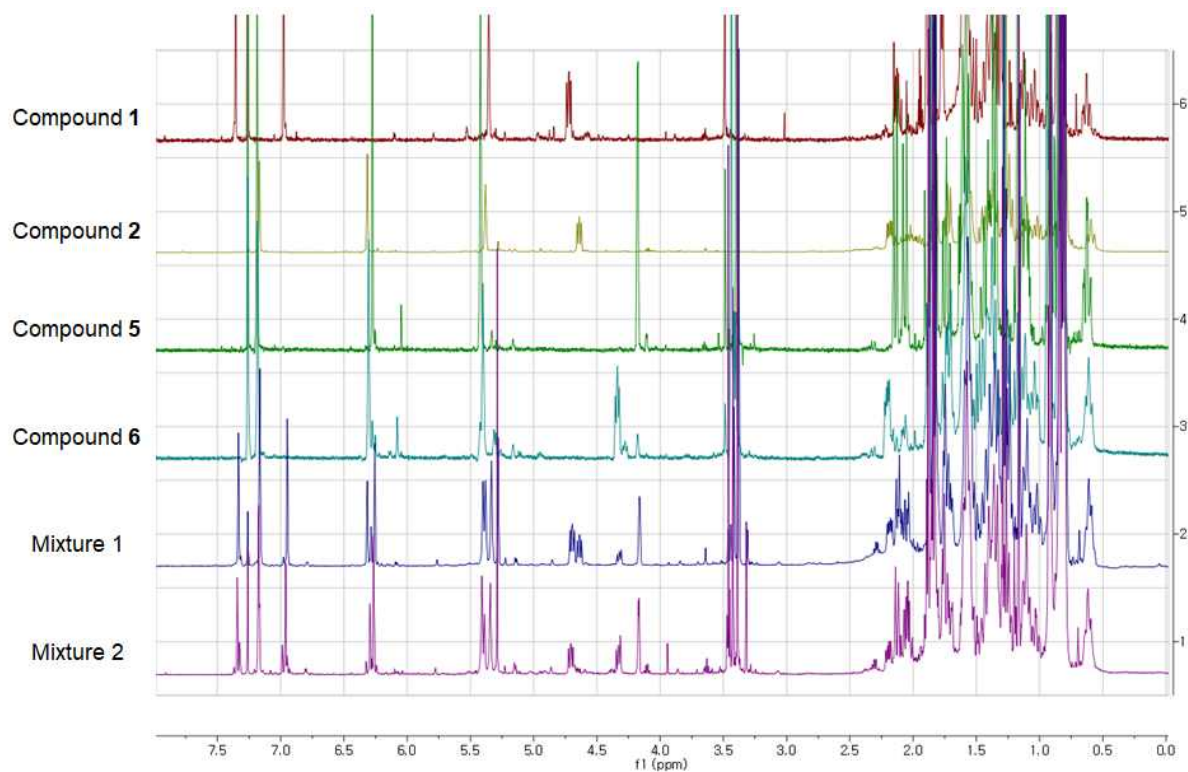

**Mixture 1** : The fraction obtained by silica HPLC (methanol/dichloromethane) of the mixture of **1** and **2**

**Mixture 2**: The crude material obtained by the treatment of the mixture of **1** and **2** with silica and methanol for 60 min
